# Supplementary material
Source: publisher figshare collection journal article supplement (https://acs.figshare.com/ndownloader/files/29081628)
Supplement: Supplementary file 1 [file 29081628]

## **Supporting information**

### **Volumetric double-layer charge storage in composites based on conducting polymer PEDOT and cellulose**

Ihor Sahalianov<sup>a,†</sup>, Mehmet Girayhan Say<sup>a,†</sup>, Oliya S. Abdullaeva<sup>a</sup>, Fareed Ahmed<sup>a</sup>, Eric Glowacki<sup>a,b,c</sup>, Isak Engquist<sup>a,c</sup>, Magnus Berggren<sup>a,c</sup>, Igor Zozoulenko<sup>a,c\*</sup>

<sup>†</sup>Authors contributed equally

\*Corresponding author: igor.zozoulenko@liu.se

<sup>a</sup>Laboratory of Organic Electronics, Department of Science and Technology, Linköping University, SE-601 74 Norrköping, Sweden

<sup>b</sup> Central European Institute of Technology, Brno University of Technology, Purkynova 123, Brno, 61200 Czech Republic

<sup>c</sup>Wallenberg Wood Science Center, Linköping University, SE-601 74 Norrköping, Sweden

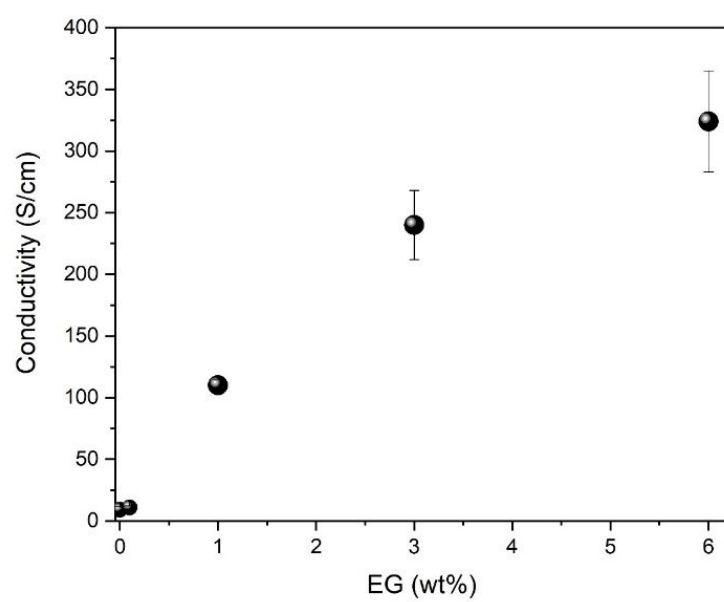

Figure S1. The electrical conductivity of Power Paper (9  $\mu\text{m}$ ) as a function of different EG concentrations. Power paper samples were fabricated for 6 wt% of EG.

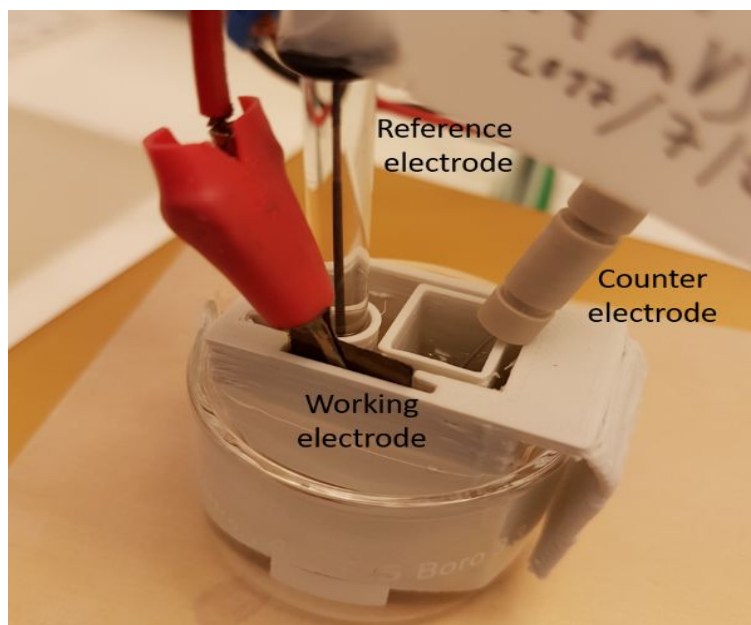

Figure S2. Picture of the three-electrode electrochemical cell.

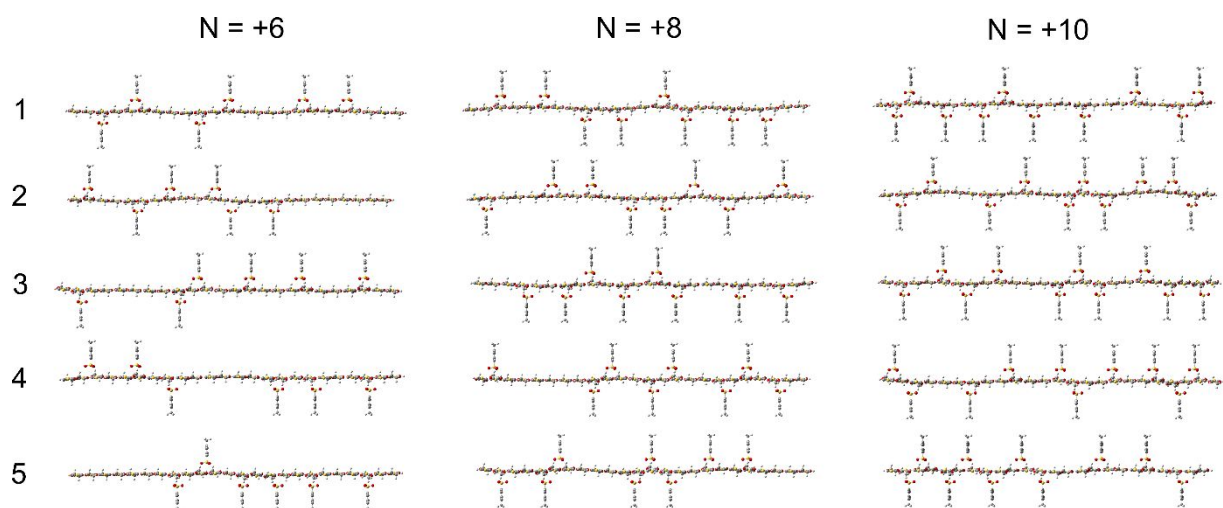

Figure S3. Examples of counterions configurations surrounding PEDOT oligomer for the first five different realizations at N = +6, +8, +10.

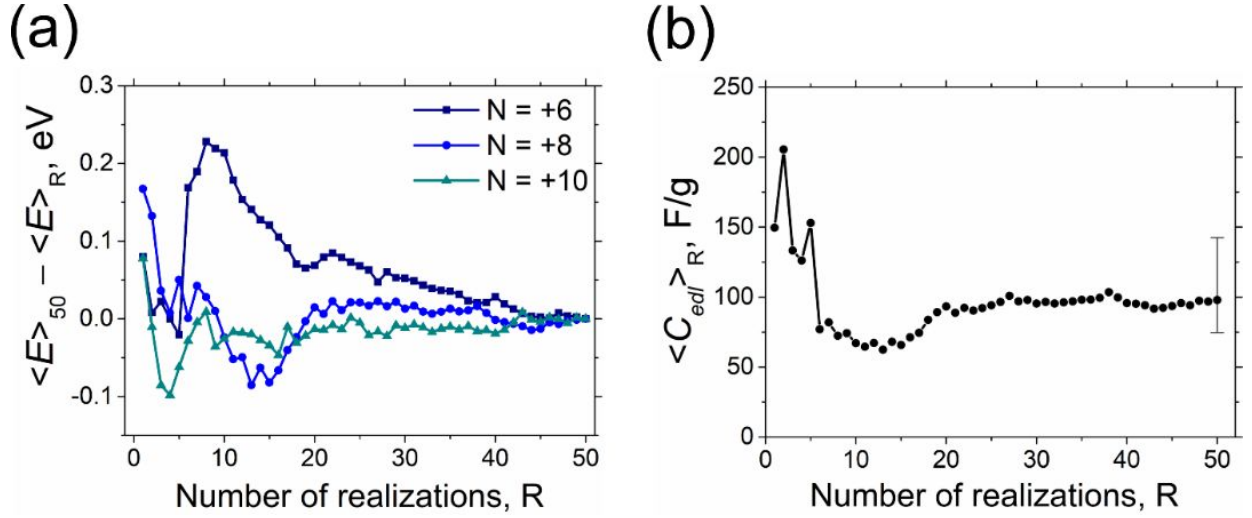

Figure S4 (a) — Dependence of the averaged total energies of PEDOT oligomer (24 monomers) charged with six, eight, or ten counterions on a number of different spatial positions of counterions. The dependence is depicted as a difference from the total energies, averaged over 50 realizations:  $\langle \Delta E \rangle_{50} - \langle \Delta E \rangle_R$ . (b) — the change of the averaged electrostatic capacitance  $\langle C_{edl} \rangle_R$ , depending on the number of different counterion realizations for a PEDOT oligomer. Because the total energy of PEDOT:TOS is dependent on the TOS positions, we calculated fifty different counterion realization for  $q = +6, +8, +10$  charged PEDOT. The final value of  $C_{EDL}$  was obtained after 50 realizations.

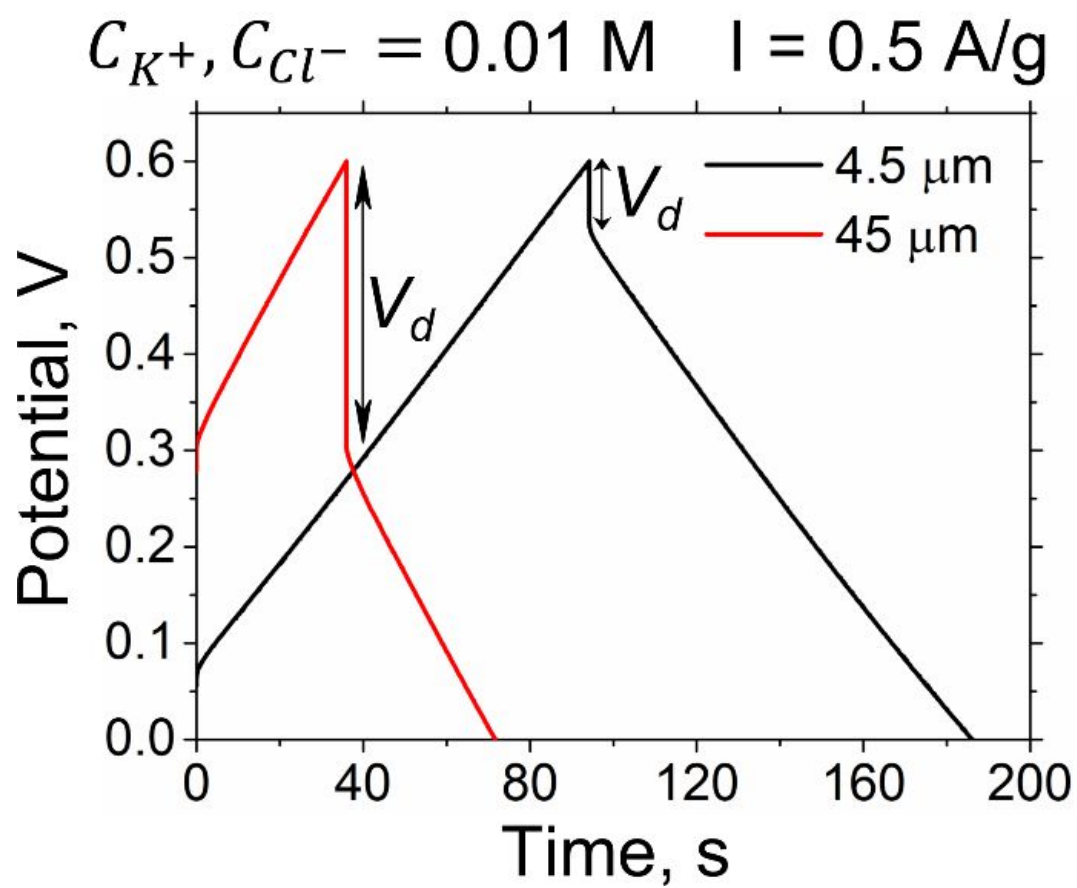

Figure S5. Voltage drop for thin (4.5 μm) and thick (45 μm) samples at the same current density 0.5 A/g.

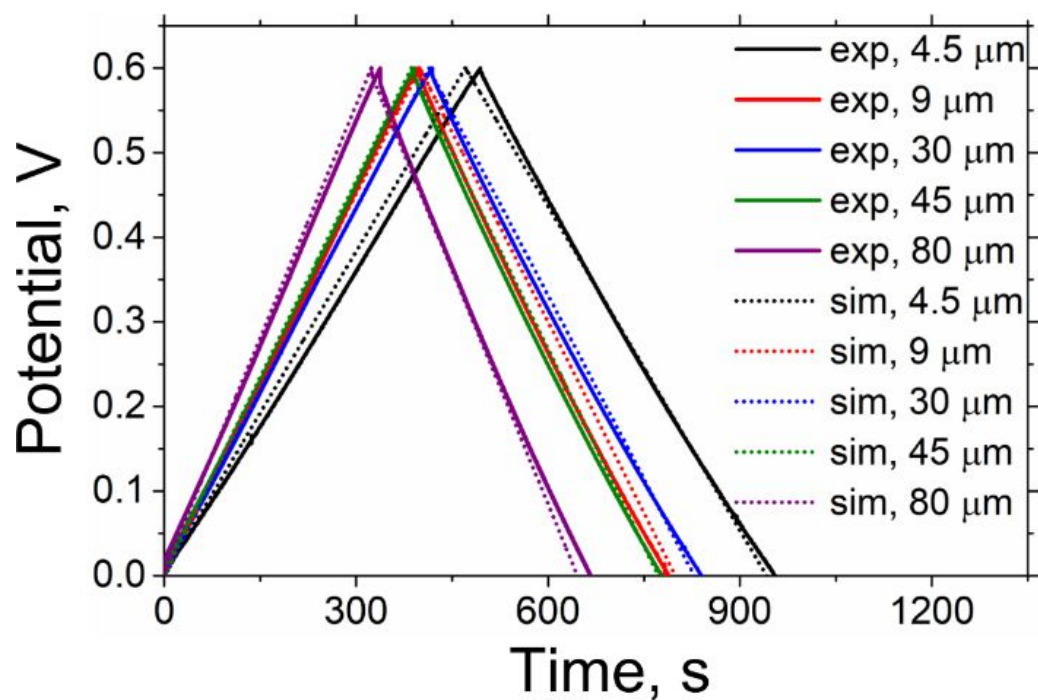

Figure S6. Experimental and simulated charge-discharge profiles for samples at all considered thicknesses and the same charging current 0.1 A/g. Due to the mass measurement errors, simulation curves were measured at slightly different currents, deviated in 10-15% from 0.1 A/g: 0.085 A/g for 4.5  $\mu\text{m}$ , 0.1 A/g for 9  $\mu\text{m}$ , 0.095 A/g for 30  $\mu\text{m}$ , 0.1 A/g for 45  $\mu\text{m}$  and 0.12 A/g for 80  $\mu\text{m}$  samples. All studies were performed in 0.1 M KCl.

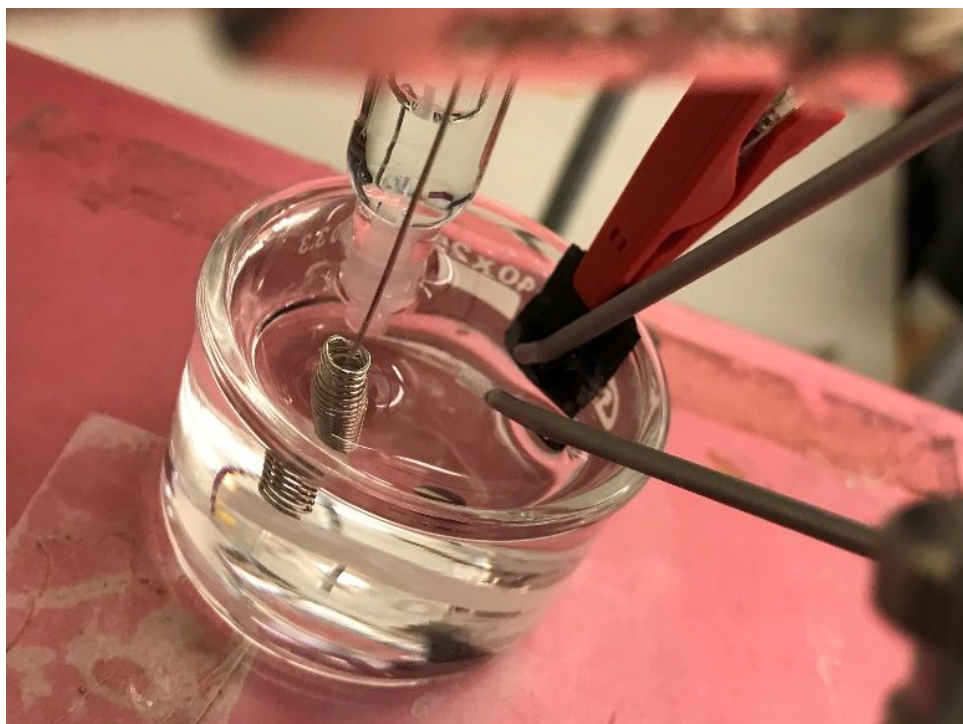

Figure S7.  $\text{H}_2\text{O}_2$  and  $\text{O}_2$  sensor (2 mm wide, WPI) assembly with GCD test cell.



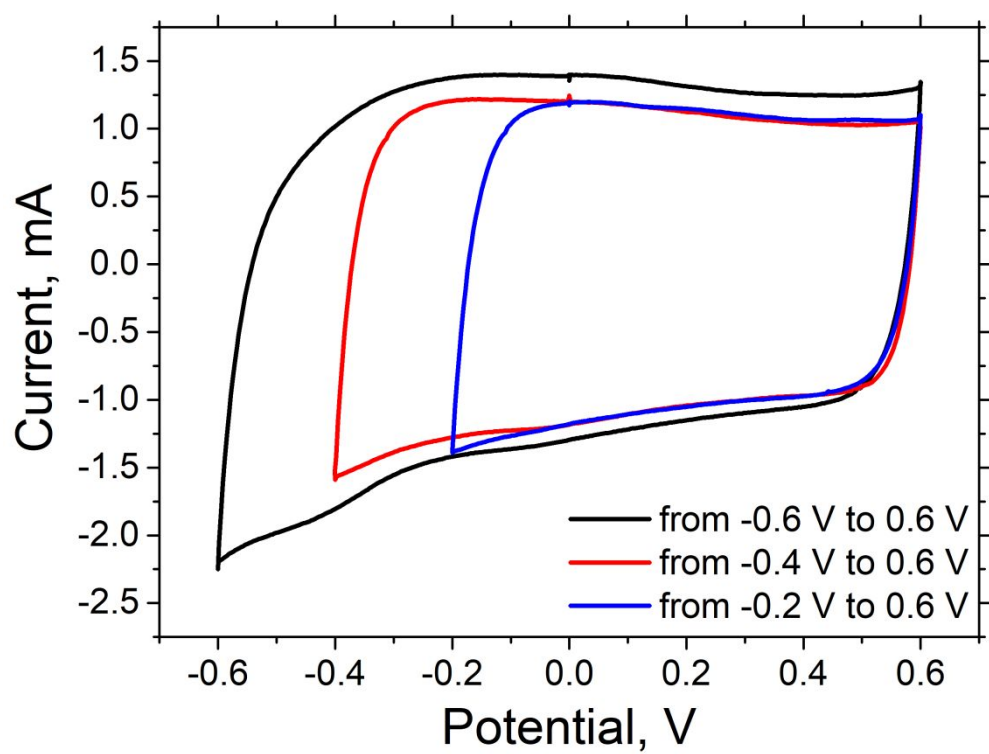

Figure S8. CV of the 9  $\mu\text{m}$  power paper at 50 mV/s between negative and positive potentials.
